# Supplementary material for: Solution-processed In2Se3 nanosheets for ultrasensitive and highly selective NO2 gas sensors
Source: Royal Society of Chemistry journal article supplement (doi:10.1039/d3ta01390a), 2023-01-01
Supplement: d3ta01390a1.pdf [file d3ta01390a1.pdf]

## ELECTRONIC SUPPLEMENTARY INFORMATION

# Solution-processed In<sub>2</sub>Se<sub>3</sub> nanosheets for ultrasensitive and highly selective NO<sub>2</sub> gas sensors

Gianluca D'Olimpio<sup>1,§</sup>, Vardan Galstyan<sup>2,3§</sup>, Corneliu Ghica<sup>4</sup>, Mykhailo Vorokhta<sup>5</sup>,  
Marian Cosmin Istrate<sup>4</sup>, Chia-Nung Kuo<sup>6,7</sup>, Chin Shan Lue<sup>6,7</sup>, Danil W. Boukhvalov<sup>8,9,\*</sup>,  
Elisabetta Comini<sup>2,\*</sup>, Antonio Politano<sup>1,\*</sup>

<sup>1</sup> *Department of Physical and Chemical Sciences, University of L'Aquila, via Vetoio, 67100 L'Aquila (AQ), Italy*

<sup>2</sup> *Sensor Lab, Department of Information Engineering, University of Brescia, Via Valotti 9, 25133 Brescia, Italy*

<sup>3</sup> *Department of Engineering "Enzo Ferrari", University of Modena and Reggio Emilia, Via Vivarelli 10, 41125 Modena, Italy*

<sup>4</sup> *National Institute of Materials Physics, Atomistilor 405A, 077125 Magurele, Romania*

<sup>5</sup> *Charles University, V Holesovickách 2, Prague 8, 18000 Prague, Czech Republic*

<sup>6</sup> *Department of Physics, National Cheng Kung University, 1 Ta-Hsueh Road, 70101 Tainan, Taiwan*

<sup>7</sup> *Taiwan Consortium of Emergent Crystalline Materials, National Science and Technology Council, Taipei 10601, Taiwan*

<sup>8</sup> *College of Science, Institute of Materials Physics and Chemistry, Nanjing Forestry University, Nanjing 210037, P. R. China*

<sup>9</sup> *Institute of Physics and Technology, Ural Federal University, Mira 19 Str., Yekaterinburg 620002, Russia*

## S1. Gas sensing measurements

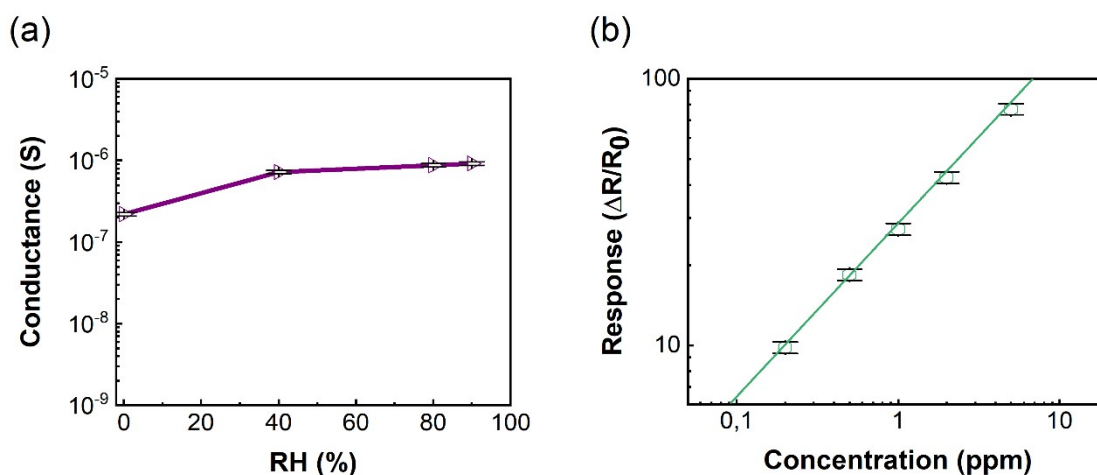

**Figure S1.** (a) Electrical conductance dependence of  $In_2Se_3$  on the relative humidity (RH) concentration at an operating temperature of 300 °C. (b) Calibration curve of the normalized sensing response ( $\Delta R/R_0$ ) of  $\alpha-In_2Se_3$  towards  $NO_2$  at an operating temperature of 300 °C and RH of 40%. The response value for the pristine structure was set to 1 to estimate the limit of detection (LOD), which was found to be approximately 5 ppb for  $\alpha-In_2Se_3$ .

**Table S1.** Gas sensing parameters of  $In_2Se_3$  towards different concentrations of  $NO_2$  at an operating temperature of 300 °C.

| Concentration (ppm) | Response |
|---------------------|----------|
| 0.2                 | 9.8      |
| 0.5                 | 18.4     |
| 1                   | 27.3     |
| 2                   | 42.6     |
| 5                   | 77.0     |

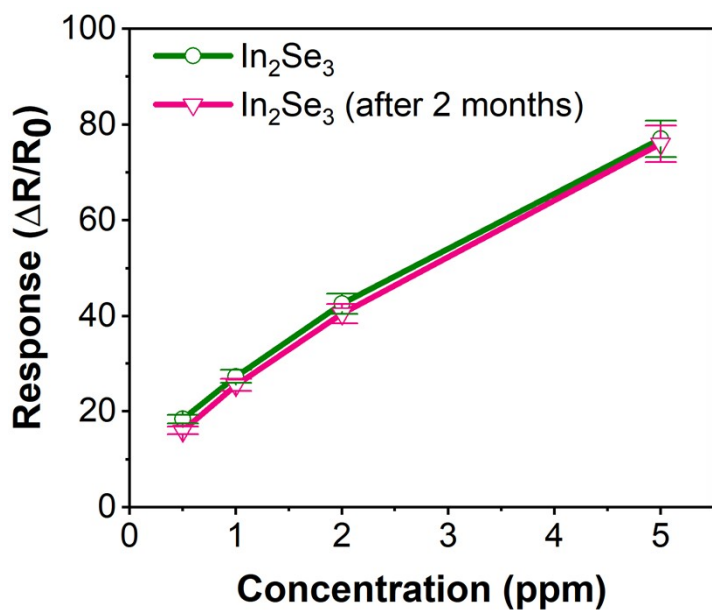

**Figure S2.** The response of  $\alpha\text{-In}_2\text{Se}_3$  towards 0.5, 1, 2, and 5 ppm of  $\text{NO}_2$  at its optimum operating temperature (300 °C). The results were obtained after the first-time measurements and two months later.

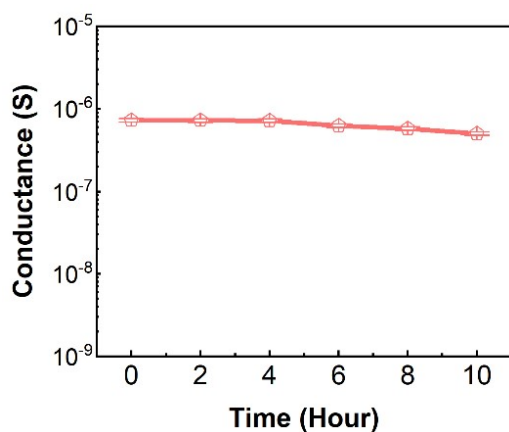

**Figure S3.** The conductance vs time dependence of  $\alpha\text{-In}_2\text{Se}_3$  at 300 °C. The conductance values were registered after the gas test of the material to each concentration of  $\text{NO}_2$  (0.2, 0.5, 1, 2, and 5 ppm) and its recovery in air (please see Figure 5b in the paper). The gas test for each concentration of  $\text{NO}_2$  lasts 2 h.

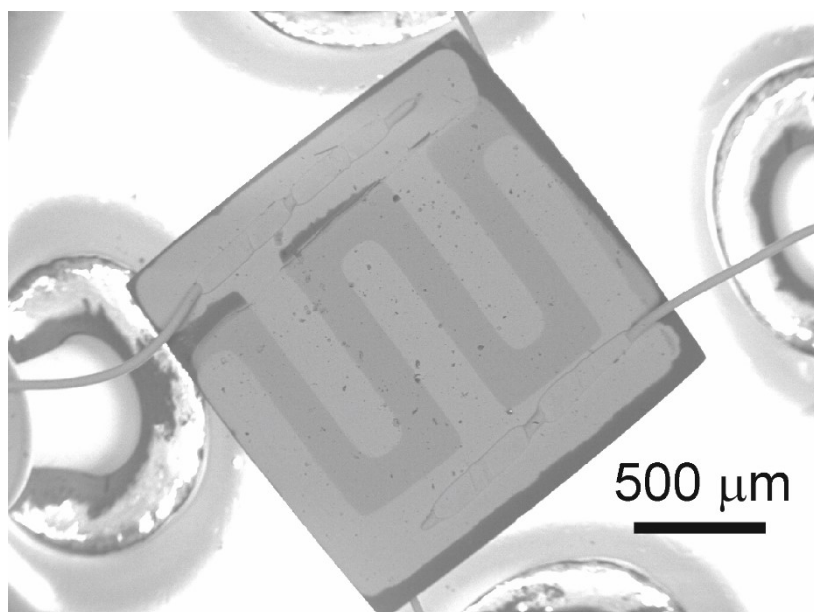

**Figure S4.** SEM image of Pt interdigitated electrodes deposited on the  $Al_2O_3$  substrate.

## S2. Literature comparison

**Table S2.** Comparison of gas sensing properties of  $\alpha$ - $In_2Se_3$  with sensing structures comprising 2D semiconductors and metal-oxide nanostructures.  $V_a$  denotes the output voltage of the sensor in air, while  $V_g$  represents the output voltage under exposure to  $NO_2$ .

| Material                            | $NO_2$ concentration (ppm) | Response $[(R_f - R_0)/R_0]$           | Operating temperature ( $^{\circ}C$ ) | Estimated LOD (ppb) |
|-------------------------------------|----------------------------|----------------------------------------|---------------------------------------|---------------------|
| $SnS_2$ <sup>1</sup>                | 5                          | 2.5                                    | 200                                   | –                   |
| $Sb_2Se_3$ <sup>2</sup>             | 2                          | 0.8, $(R_a - R_g)/R_a$                 | 140                                   | 60                  |
| N-doped $In_2S_3$ <sup>3</sup>      | 10                         | 0.1, $(R_a - R_g)/R_a$                 | RT                                    | –                   |
| $SnO_2/SnSe_{1.7}$ <sup>4</sup>     | 1                          | 2.2                                    | 150                                   | 360                 |
| $In_2O_3/SnS_2$ <sup>5</sup>        | 50                         | 15,* $V_g/V_a$                         | 25                                    | –                   |
| $In_2S_3/In_2O_3$ <sup>6</sup>      | 1                          | 24                                     | 160                                   |                     |
| $SnO_2/SnS_2$ <sup>7</sup>          | 3                          | 15.33, $R_a/R_g$                       | 60                                    | 37                  |
| $SnSe_2/SnO/SnSe$ <sup>8</sup>      | 5                          | 2.6                                    | RT                                    | 115                 |
| reduced graphene oxide <sup>9</sup> | 1                          | 0.6, <sup>§</sup><br>$(G_f - G_0)/G_0$ | 450                                   | 50                  |
| Black phosphorus                    | 25                         | 0.2                                    | RT                                    | –                   |
| Al-Black phosphorus                 | 1                          | 0.1                                    | 70                                    | –                   |

|                                                                                       |     |                                     |     |      |
|---------------------------------------------------------------------------------------|-----|-------------------------------------|-----|------|
| 10                                                                                    |     |                                     |     |      |
| reduced graphene oxide/MoS <sub>2</sub> <sup>11</sup>                                 | 10  | 0.1                                 | RT  | –    |
| C/g-C <sub>3</sub> N <sub>4</sub> <sup>12</sup>                                       | 50  | 0.7                                 | 200 | 7390 |
| In <sub>2</sub> O <sub>3</sub> nanoparticles <sup>13</sup>                            | 1.2 | 0.1, R <sub>a</sub> /R <sub>g</sub> | 300 | –    |
| In <sub>2</sub> O <sub>3</sub> nanoparticles <sup>14</sup>                            | 40  | 6, R <sub>a</sub> /R <sub>g</sub>   | 225 | –    |
| In <sub>2</sub> O <sub>3</sub> nanoparticles/SnO <sub>2</sub> nanowires <sup>15</sup> | 5   | 24                                  | 300 | –    |
| SnO <sub>2</sub> nanowires <sup>15</sup>                                              | 5   | 2.3                                 | 300 | –    |
| α-In <sub>2</sub> Se <sub>3</sub> (this work)                                         | 1   | 27.3                                | 300 | 5    |

\* Room temperature

§ G<sub>0</sub> is the baseline conductance value of the sensor in air, and G<sub>f</sub> is the steady state conductance value of the sensor in presence of NO<sub>2</sub>.

### S3. O-1s core level measured by XPS

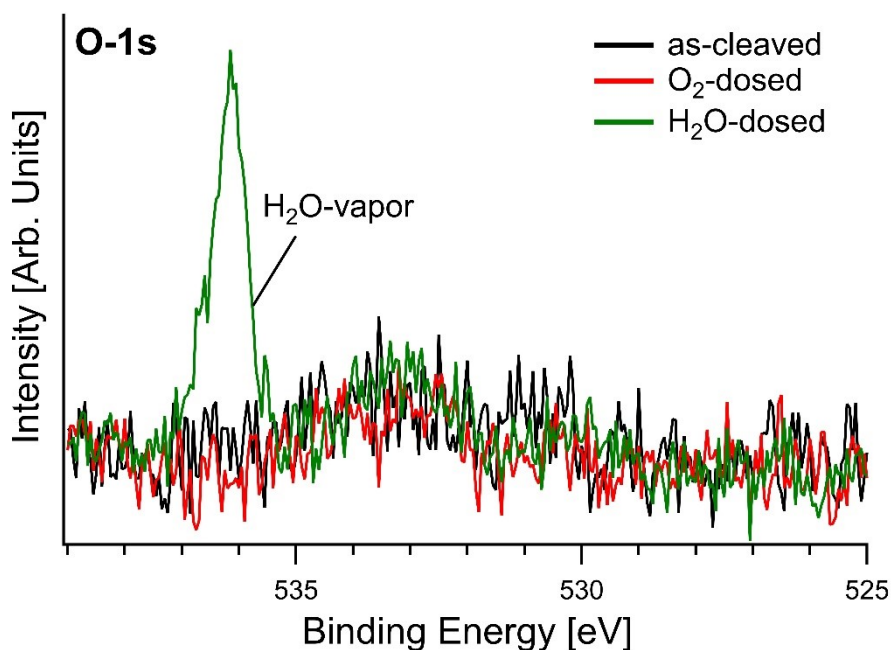

**Figure S5.** O-1s core level for the as-cleaved surface of α-In<sub>2</sub>Se<sub>3</sub> and for its modification after an exposure of 10<sup>10</sup> L of O<sub>2</sub> and H<sub>2</sub>O at room temperature.

**Table S3.** Differential enthalpy and Gibbs free energies at 400 °C for the surface of bulk/monolayer of  $\beta$ -In<sub>2</sub>Se<sub>3</sub> with and without Se-vacancies. Negative values indicate exothermic processes, while positive values indicate endothermic processes.

| Substrate                                | Analyte                                     | $\Delta H$ , kJ/mol | $\Delta G$ (400 °C), kJ/mol |
|------------------------------------------|---------------------------------------------|---------------------|-----------------------------|
| $\beta$ -In <sub>2</sub> Se <sub>3</sub> | O <sub>2</sub>                              | -133.2 / +26.3      | -107.3 / +52.2              |
|                                          | H <sub>2</sub>                              | -2.6 / -70.4        | +16.1 / -51.7               |
|                                          | H <sub>2</sub> O                            | -296.7 / -61.3      | -226.0 / +9.4               |
|                                          | CO                                          | -237.9 / -75.6      | -205.6 / -43.3              |
|                                          | CO <sub>2</sub>                             | -289.6 / -78.2      | -253.3 / -41.9              |
|                                          | NO <sub>2</sub>                             | -270.2 / -83.4      | -214.9 / -8.7               |
|                                          | NO <sub>2</sub> +H <sub>2</sub> O           | +18.7 / -3.8        | +93.4 / +70.9               |
|                                          | Ethanol                                     | -306.5 / -95.4      | -251.0 / -39.9              |
|                                          | Acetone                                     | -289.7 / -84.1      | -216.3 / -10.7              |
|                                          | NH <sub>3</sub>                             | -314.8 / -100.8     | -250.9 / -36.9              |
|                                          | H <sub>2</sub> S                            | -302.9 / -86.7      | -244.3 / -28.1              |
|                                          | $\beta$ -In <sub>2</sub> Se <sub>2.97</sub> | O <sub>2</sub>      | -4.9 / -56.0                |
| H <sub>2</sub>                           |                                             | -17.3 / -8.3        | +1.4 / +10.4                |
| H <sub>2</sub> O                         |                                             | -255.9 / -48.2      | -185.2 / +22.5              |
| CO                                       |                                             | -53.7 / -37.5       | -21.4 / -5.2                |
| CO <sub>2</sub>                          |                                             | -214.0 / -24.3      | -177.7 / +12.0              |
| NO <sub>2</sub>                          |                                             | -67.9 / -193.3      | +6.8 / -118.6               |
| Ethanol                                  |                                             | -284.8 / -97.0      | -229.3 / -41.5              |
| Acetone                                  |                                             | -282.5 / -103.2     | -218.4 / -29.8              |
| NH <sub>3</sub>                          |                                             | -291.8 / -84.1      | -227.9 / -20.2              |
| H <sub>2</sub> S                         |                                             | -249.4 / -60.2      | -190.8 / -1.6               |

## References

1. M. Cheng, Z. Wu, G. Liu, L. Zhao, Y. Gao, B. Zhang, F. Liu, X. Yan, X. Liang, P. Sun and G. Lu, *Sens. Actuators B Chem.*, 2019, **291**, 216-225.
2. Y. B. Kim, S. H. Jung, D. S. Kim, N. G. Deshpande, H. W. Suh, H. H. Lee, J. H. Choi, H. S. Lee and H. K. Cho, *Adv. Funct. Mater.*, 2021, **31**, 2102439.
3. Y. Cheng, Z. Li, T. Tang, K. Xu, H. Yu, X. Tao, C. M. Hung, N. D. Hoa, Y. Fang, B. Ren, H. Chen and J. Z. Ou, *Applied Materials Today*, 2022, **26**, 101355.
4. V. Paolucci, G. D'Olimpio, C.-N. Kuo, C. S. Lue, D. W. Boukhvalov, C. Cantalini and A. Politano, 2020.
5. Y. Yang, D. Zhang, D. Wang, Z. Xu and J. Zhang, *J. Mater. Chem. A*, 2021, **9**, 14495-14506.
6. B.-R. Wang, L.-Y. Liu, G.-C. Guo, Y.-J. Bai, J.-C. Tu and R.-Z. Wang, *Appl. Surf. Sci.*, 2022, **584**, 152669.
7. H. Yang, C. Zhu, Q. Wu, X. Li, H. Wang, J. Wan, C. Xie and D. Zeng, *Appl. Surf. Sci.*, 2022, **601**, 154213.
8. S. Rani, M. Kumar, P. Garg, R. Parmar, A. Kumar, Y. Singh, V. Baloria, U. Deshpande and V. N. Singh, *ACS Appl. Mater. Interfaces*, 2022, **14**, 15381-15390.
9. S. Cui, H. Pu, E. C. Mattson, Z. Wen, J. Chang, Y. Hou, C. J. Hirschmugl and J. Chen, *Anal. Chem.*, 2014, **86**, 7516-7522.
10. G. Lee, S. Kim, S. Jung, S. Jang and J. Kim, *Sens. Actuators B Chem.*, 2017, **250**, 569-573.
11. B. Han, Z. Duan, J. Xu, Y. Zhu, Q. Xu, H. Wang, H. Tai, J. Weng and Y. Zhao, *Adv. Funct. Mater.*, 2020, **30**, 2002232.
12. A. Govind, P. Bharathi, G. Mathankumar, M. K. Mohan, J. Archana, S. Harish and M. Navaneethan, *Diamond Relat. Mater.*, 2022, **128**, 109205.
13. P. Sowti khiabani, E. Marzbanrad, H. Hassani and B. Raissi, *J. Am. Ceram. Soc.*, 2013, **96**, 2493-2498.
14. S. Shah, S. Han, S. Hussain, G. Liu, T. Shi, A. Shaheen, Z. Xu, M. Wang and G. Qiao, *Ceram. Int.*, 2022, **48**, 12291-12298.
15. S. Park, Y. W. Jung, G. M. Ko, D. Y. Jeong and C. Lee, *Applied Physics A*, 2021, **127**, 898.
